# Supplementary material for: Nanocellulose/polypyrrole aerogel electrodes with higher conductivity via adding vapor grown nano-carbon fibers as conducting networks for supercapacitor application
Source: Royal Society of Chemistry journal article supplement (doi:10.1039/c8ra07054g), 2018-01-01
Supplement: c8ra07054g1.pdf [file c8ra07054g1.pdf]

## Electronic Supplementary Information

### **Nanocellulose/polypyrrole aerogel electrodes with higher conductivity via adding vapor grown nano-carbon fiber as conducting networks for supercapacitor application**

Yanping Chen,<sup>[a,b]</sup> Shaoyi Lyu,<sup>\*[b]</sup> Shenjie Han,<sup>[b]</sup> Zhilin Chen,<sup>[b]</sup> Wenjun Wang<sup>\*[a]</sup>  
and Siqun Wang<sup>[c,b]</sup>

[a] Beijing Engineering Research Center of Cellulose and Its Derivatives, School of Materials Science and Engineering, Beijing Institute of Technology, Beijing 100081, China. Email: wangwenjun@bit.edu.cn

[b] Research Institute of Wood Industry, Chinese Academy of Forestry, Beijing 100091, China. Email: lvsy@caf.ac.cn

[c] Center for Renewable Carbon, University of Tennessee, Knoxville, Tennessee, 37996, USA

## 1.Supporting Tables

Table S1. Details of the porous properties of CNF/VGCF and CNF/VGCF/PPy aerogels with different VGCF contents

| Samples                         | BET Specific surface area ( $\text{m}^2 \text{g}^{-1}$ ) | Average pore diameter (nm) | Total pore volume ( $\text{cm}^3 \text{g}^{-1}$ ) |
|---------------------------------|----------------------------------------------------------|----------------------------|---------------------------------------------------|
| CNF/VGCF <sub>0.2</sub> aerogel | 50.93                                                    | 10.69                      | 0.1344                                            |
| CNF/VGCF <sub>0.5</sub> aerogel | 61.51                                                    | 10.48                      | 0.1547                                            |
| CNF/VGCF <sub>1</sub> aerogel   | 67.18                                                    | 11.02                      | 0.1728                                            |
| CNF/VGCF <sub>2</sub> aerogel   | 47.81                                                    | 11.47                      | 0.1338                                            |

## 2.Supporting Figures

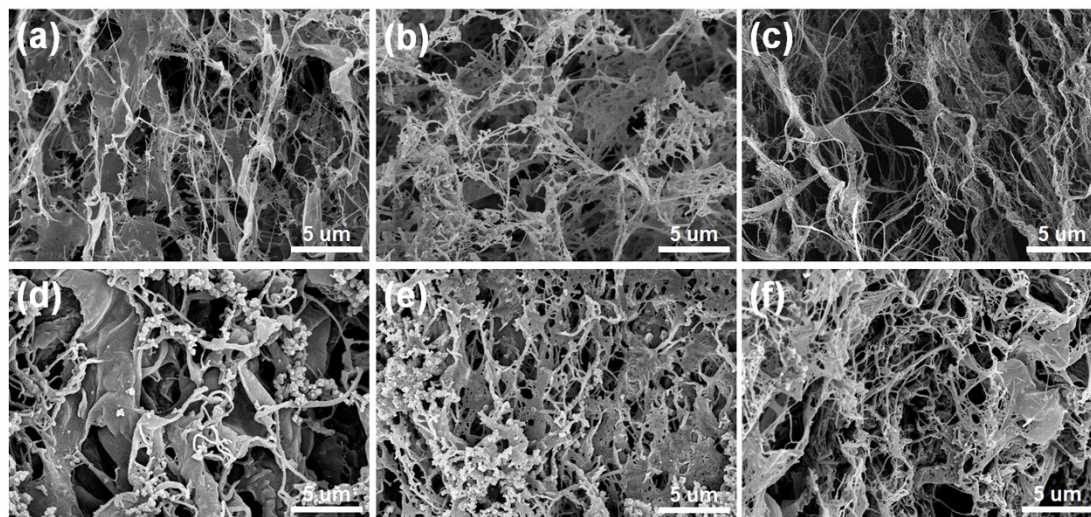

Figure S1. SEM images of (a) CNF/VGCF<sub>0.2</sub> aerogel, (b) CNF/VGCF<sub>0.5</sub> aerogel, (c) CNF/VGCF<sub>2</sub> aerogel, (d) CNF/VGCF<sub>0.2</sub>/PPy aerogel, (e) CNF/VGCF<sub>0.5</sub>/PPy aerogel, and (f) CNF/VGCF<sub>2</sub>/PPy aerogel.

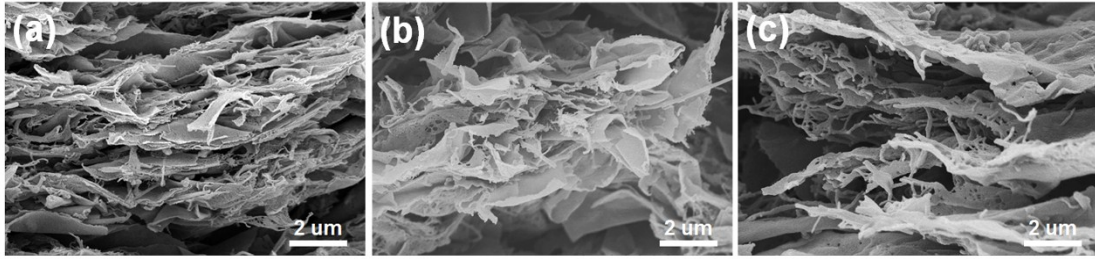

Figure S2. Cross-sectional images of the aerogel films: (a) CNF/VGCF<sub>0.2</sub>/PPy aerogel film, (b) CNF/VGCF<sub>0.5</sub>/PPy aerogel film and (c) CNF/VGCF<sub>2</sub>/PPy aerogel film.

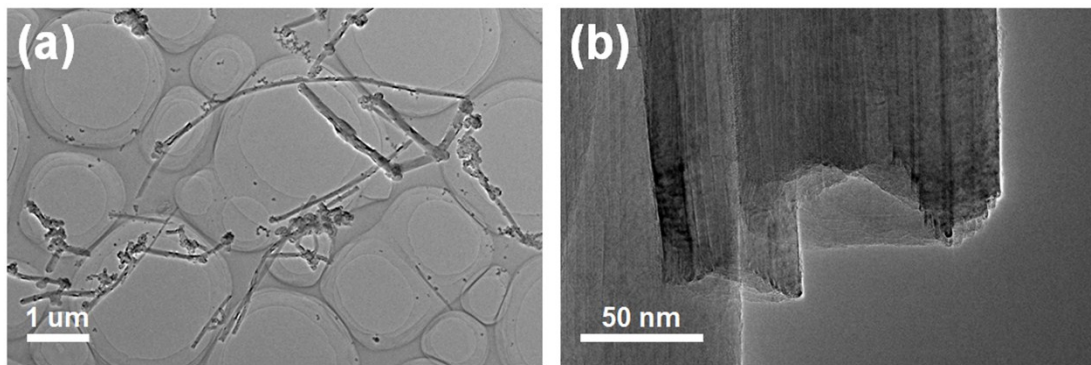

Figure S3. (a) TEM image and (b) a magnified image of VGCF.

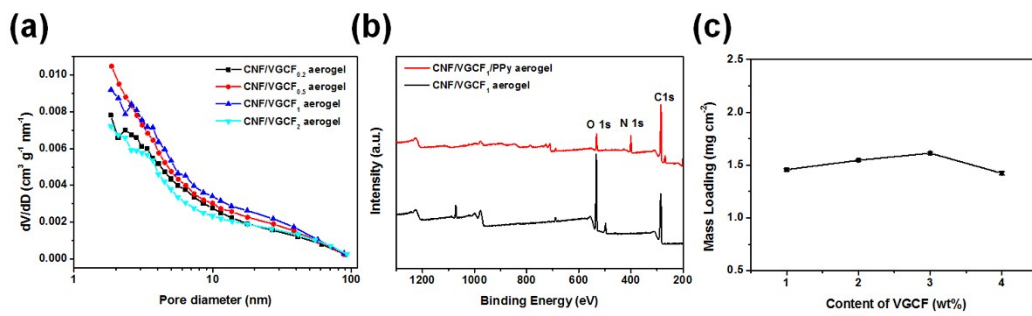

Figure S4. (a) Pore size distributions of CNF/VGCF aerogels with different VGCF contents. (b)

XPS wide-region scan spectra of CNF/VGCF<sub>1</sub> and CNF/VGCF<sub>1</sub>/PPy aerogels. (c) PPy mass loading of CNF/VGCF/PPy aerogel with different VGCF contents.

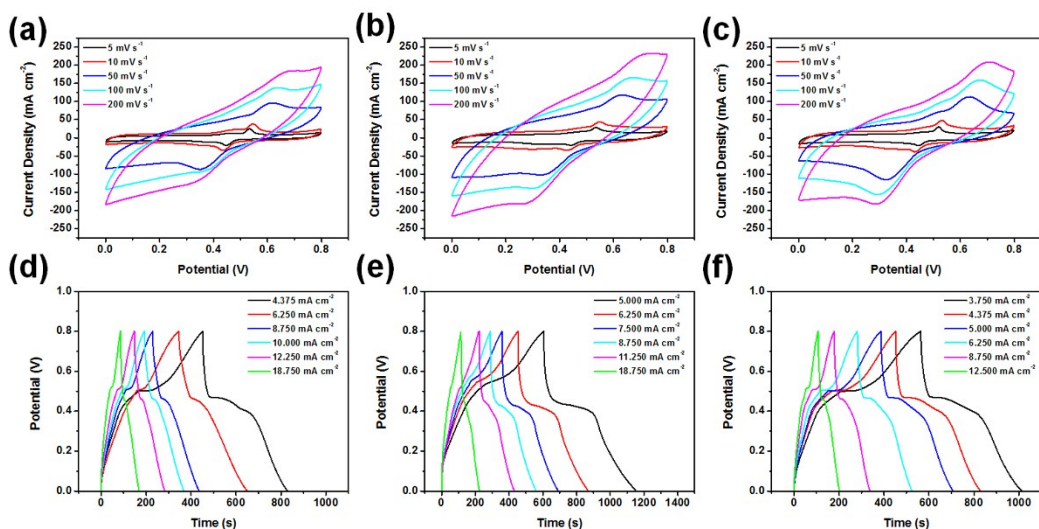

Figure S5. CV curves of (a) CNF/VGCF<sub>0.2</sub>/PPy, (b) CNF/VGCF<sub>0.5</sub>/PPy and (c) CNF/VGCF<sub>2</sub>/PPy aerogel electrodes at different scan rates. GCD curves of (d) CNF/VGCF<sub>0.2</sub>/PPy, (e) CNF/VGCF<sub>0.5</sub>/PPy and (f) CNF/VGCF<sub>2</sub>/PPy aerogel electrodes at different current densities. All data were measured in a three-electrode test.

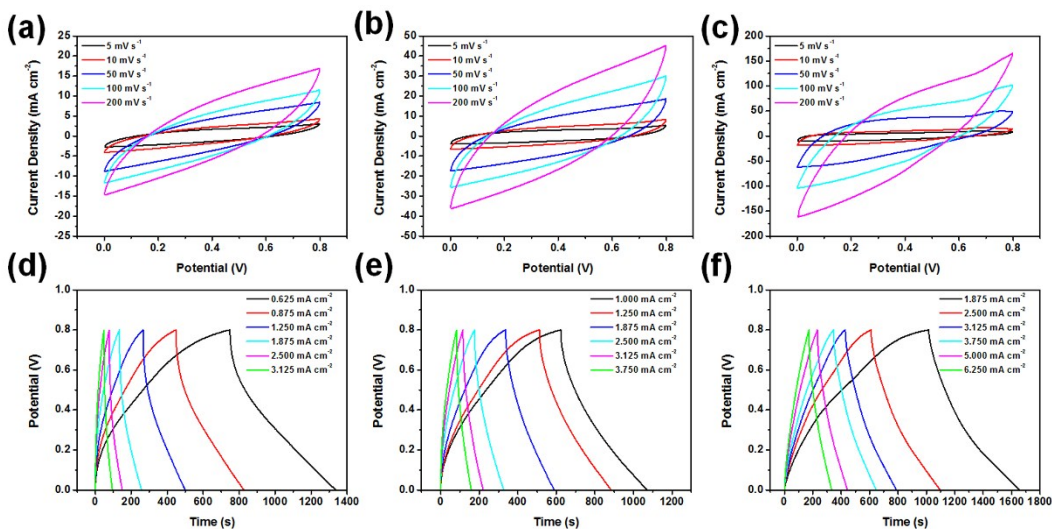

Figure S6. CV curves of (a) CNF/VGCF<sub>0.2</sub>/PPy, (b) CNF/VGCF<sub>0.5</sub>/PPy and (c) CNF/VGCF<sub>2</sub>/PPy aerogel electrodes at different scan rates. GCD curves of (d) CNF/VGCF<sub>0.2</sub>/PPy, (e) CNF/VGCF<sub>0.5</sub>/PPy and (f) CNF/VGCF<sub>2</sub>/PPy aerogel electrodes at different current densities. All data were measured in a two-electrode test.



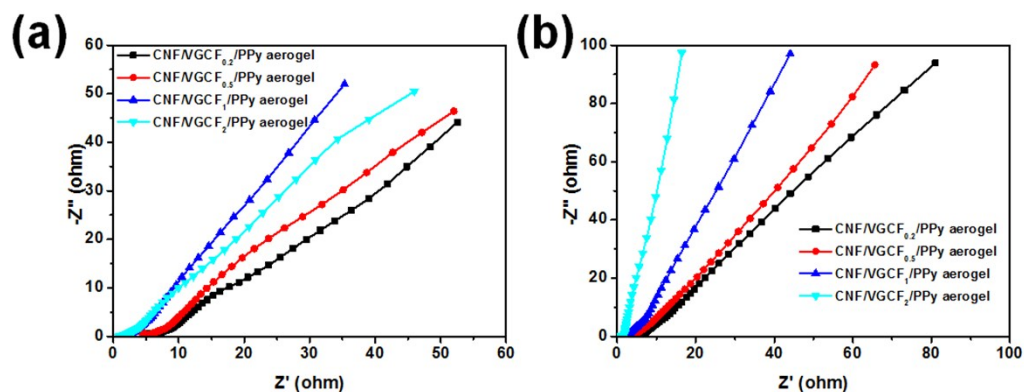

Figure S7. Nyquist impedance plots of CNF/VGCF/PPy aerogel electrodes with different VGCF contents. The data of (a) were measured in a three-electrode test. And the data of (b) were measured in a two-electrode test.

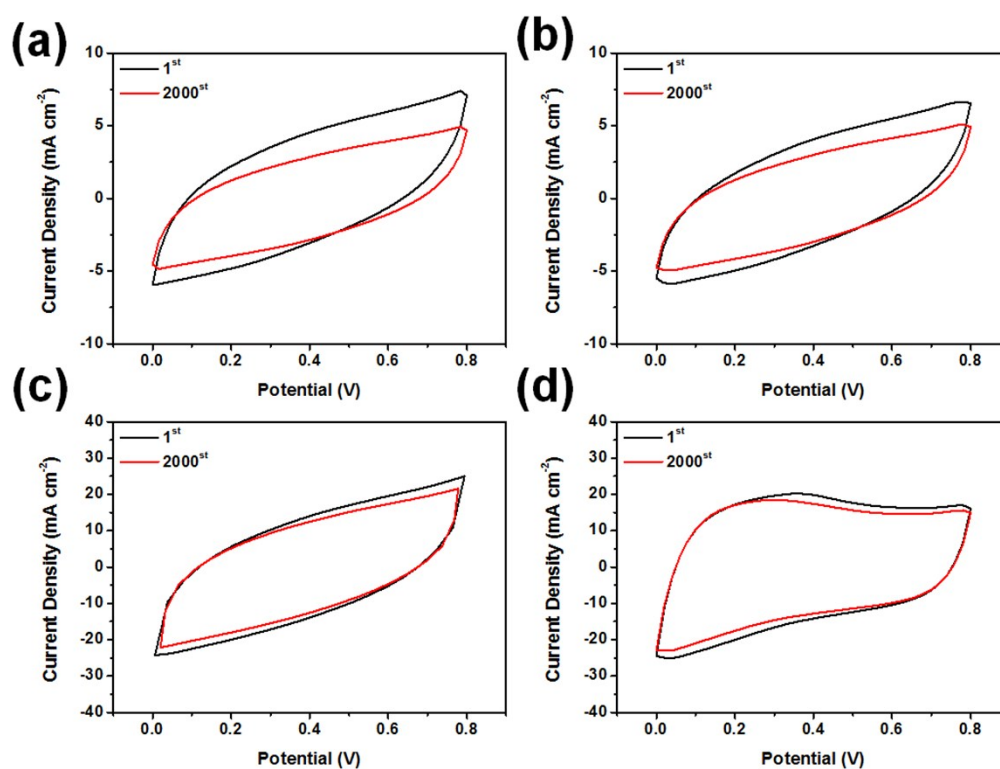

Figure S8. CV curves of (a) CNF/VGCF<sub>0.2</sub>/PPy, (b) CNF/VGCF<sub>0.5</sub>/PPy, (c) CNF/VGCF<sub>1</sub>/PPy and (d) CNF/VGCF<sub>2</sub>/PPy aerogel electrodes at 20 mV s<sup>-1</sup> during cycle-stability testing. All data were measured in a two-electrode test.
